# Supplementary material
Source: bioRxiv or medRxiv preprint supplement (https://www.medrxiv.org/highwire/filestream/81486/field_highwire_adjunct_files/0/2020.05.07.20072728-1.pdf)
Supplement: Supplementary file [file 2020.05.07.20072728-1.pdf]

## Supplementary data

### Supplementary Tables

**Table S1.** All Rare *PRKN* variants found in cases and controls.

**Table S2.** CNV detection methods parameters and performance compared to MLPA.

**Table S3.** *PRKN* CNV carriers in cases and controls

**Table S4.** Rare *PRKN* heterozygous SNVs and CNVs analysis for risk of PD using SKAT-O in different variant groups

**Table S5.** Rare *PRKN* heterozygous SNVs and CNVs analysis for Age at Onset of PD in different variant groups

**Table S6.** Rare *PRKN* SNVs and CNVs association analysis in PD from previous studies.

**Table S1. All Rare *PRKN* variants found in cases and controls.**

| Chr               | Pos       | SNP             | Freq A  | Freq C  | Sig           | Anno       | Count of A | Count of C | ALL genome AF | ASJ genome AF | NFE genome AF |
|-------------------|-----------|-----------------|---------|---------|---------------|------------|------------|------------|---------------|---------------|---------------|
| McGill University |           |                 |         |         |               |            |            |            |               |               |               |
| 6                 | 161769074 | rs903465113:A:C | 0.0E+00 | 2.0E-04 | Uncertain     | c.*2057T>G | 0          | 1          | 3.2E-05       | 0             | 6.7E-05       |
| 6                 | 161769083 | rs886180554:A:C | 1.5E-03 | 8.2E-04 | Uncertain     | c.*2048T>G | 3          | 4          | 6.5E-05       | 0             | 1.0E-04       |
| 6                 | 161769108 | rs752358219:A:G | 0.0E+00 | 2.0E-04 | Uncertain     | c.*2023T>C | 0          | 1          | 3.0E-04       | 0             | 5.0E-04       |
| 6                 | 161769111 | 6:161769111:G:A | 0.0E+00 | 2.0E-04 | Uncertain     | c.*2020C>T | 0          | 1          | 0             | 0             | 0             |
| 6                 | 161769313 | rs114587790:C:T | 0.0E+00 | 2.0E-04 | Likely benign | c.*1818G>A | 0          | 1          | 6.8E-03       | 0             | 1.0E-04       |
| 6                 | 161769314 | 6:161769314:G:A | 0.0E+00 | 2.0E-04 | Uncertain     | c.*1817C>T | 0          | 1          | 0             | 0             | 0             |
| 6                 | 161769342 | 6:161769342:T:C | 0.0E+00 | 4.1E-04 | Uncertain     | c.*1789A>G | 0          | 2          | 0             | 0             | 0             |
| 6                 | 161769436 | rs77283740:C:T  | 5.8E-03 | 4.5E-03 | Benign        | c.*1695G>A | 11         | 22         | 1.4E-02       | 1.7E-02       | 2.2E-03       |
| 6                 | 161769446 | rs187134044:T:C | 4.9E-04 | 6.1E-04 | Uncertain     | c.*1685A>G | 1          | 3          | 7.0E-04       | 0             | 1.3E-03       |
| 6                 | 161769530 | rs779851186:C:T | 1.5E-03 | 0.0E+00 | Uncertain     | c.*1601G>A | 3          | 0          | 2.0E-04       | 0             | 2.0E-04       |
| 6                 | 161769531 | rs889401575:G:A | 4.9E-04 | 0.0E+00 | Uncertain     | c.*1600C>T | 1          | 0          | 6.5E-05       | 0             | 1.0E-04       |
| 6                 | 161769549 | rs748008270:C:T | 0.0E+00 | 2.0E-04 | Uncertain     | c.*1582G>A | 0          | 1          | 6.5E-05       | 0             | 6.7E-05       |
| 6                 | 161769581 | rs567890129:T:C | 0.0E+00 | 4.1E-04 | Uncertain     | c.*1550A>G | 0          | 2          | 2.0E-04       | 0             | 4.0E-04       |
| 6                 | 161769631 | 6:161769631:G:A | 0.0E+00 | 2.0E-04 | Uncertain     | c.*1500C>T | 0          | 1          | 0             | 0             | 0             |
| 6                 | 161769669 | rs11961229:G:T  | 0.0E+00 | 2.0E-04 | Benign        | c.*1462C>A | 0          | 1          | 7.4E-03       | 0             | 0             |
| 6                 | 161769708 | 6:161769708:G:A | 0.0E+00 | 6.1E-04 | Uncertain     | c.*1423C>T | 0          | 3          | 0             | 0             | 0             |

| Chr | Pos       | SNP                 | Freq A  | Freq C  | Sig       | Anno               | Count of A | Count of C | ALL genome AF | ASJ genome AF | NFE genome AF |
|-----|-----------|---------------------|---------|---------|-----------|--------------------|------------|------------|---------------|---------------|---------------|
| 6   | 161769724 | rs11961237:G:A      | 0.0E+00 | 2.0E-04 | Benign    | c.*1407C>T         | 0          | 1          | 7.3E-03       | 0             | 0             |
| 6   | 161769745 | rs140107485:T:C     | 8.8E-03 | 6.1E-03 | Uncertain | c.*1386A>G         | 18         | 30         | 1.5E-03       | 0             | 2.5E-03       |
| 6   | 161769850 | rs571904443:G:A     | 9.7E-04 | 0.0E+00 | Uncertain | c.*1281C>T         | 2          | 0          | 6.5E-05       | 3.3E-03       | 0             |
| 6   | 161769879 | rs77926621:G:A      | 5.9E-03 | 5.3E-03 | Benign    | c.*1252C>T         | 11         | 26         | 9.8E-03       | 1.7E-02       | 2.2E-03       |
| 6   | 161769943 | 6:161769943:T:C     | 4.9E-04 | 0.0E+00 | Uncertain | c.*1188A>G         | 1          | 0          | 0             | 0             | 0             |
| 6   | 161770125 | 6:161770125:T:C     | 0.0E+00 | 2.0E-04 | Uncertain | c.*1006A>G         | 0          | 1          | 0             | 0             | 0             |
| 6   | 161770240 | rs572345942:TTATC:T | 7.3E-03 | 6.5E-03 | Uncertain | c.*887_*890delGATA | 15         | 32         | 4.8E-03       | 0             | 6.7E-03       |
| 6   | 161770311 | rs74701717:T:A      | 5.8E-03 | 5.5E-03 | Benign    | c.*820A>T          | 11         | 27         | 2.1E-02       | 1.7E-02       | 2.3E-03       |
| 6   | 161770408 | rs895132585:T:C     | 0.0E+00 | 2.0E-04 | Uncertain | c.*723A>G          | 0          | 1          | 0             | 0             | 0             |
| 6   | 161770478 | rs760233938:C:T     | 1.0E-03 | 2.2E-04 | Uncertain | c.*653G>A          | 2          | 1          | 0             | 0             | 0             |
| 6   | 161770547 | rs567299724:C:A     | 0.0E+00 | 2.0E-04 | Uncertain | c.*584G>T          | 0          | 1          | 3.2E-05       | 0             | 6.7E-05       |
| 6   | 161770584 | 6:161770584:A:G     | 0.0E+00 | 2.0E-04 | Uncertain | c.*547T>C          | 0          | 1          | 0             | 0             | 0             |
| 6   | 161770929 | 6:161770929:CT:C    | 4.9E-04 | 0.0E+00 | Uncertain | c.*201delA         | 1          | 0          | 6.5E-05       | 0             | 1.0E-04       |
| 6   | 161770961 | rs998221207:C:T     | 4.9E-04 | 0.0E+00 | Uncertain | c.*170G>A          | 1          | 0          | 0             | 0             | 0             |
| 6   | 161770968 | rs1025324736:T:C    | 4.9E-04 | 0.0E+00 | Uncertain | c.*163A>G          | 1          | 0          | 0             | 0             | 0             |
| 6   | 161771010 | rs557142572:T:G     | 0.0E+00 | 2.0E-04 | Uncertain | c.*121A>C          | 0          | 1          | 3.2E-05       | 0             | 0             |
| 6   | 161771035 | rs916630868:C:T     | 4.9E-04 | 0.0E+00 | Uncertain | c.*96G>A           | 1          | 0          | 3.3E-05       | 0             | 0             |
| 6   | 161771037 | 6:161771037:TG:del  | 0.0E+00 | 2.0E-04 | Uncertain | c.*93_*94delA C    | 0          | 1          | 0             | 0             | 0             |

| Chr | Pos       | SNP             | Freq A  | Freq C  | Sig               | Anno          | Count of A | Count of C | ALL genome AF | ASJ genome AF | NFE genome AF |
|-----|-----------|-----------------|---------|---------|-------------------|---------------|------------|------------|---------------|---------------|---------------|
| 6   | 161771219 | rs149953814:G:A | 1.5E-03 | 2.7E-03 | Uncertain         | p.Pro437Leu   | 3          | 13         | 1.4E-03       | 0             | 2.3E-03       |
| 6   | 161771240 | rs191486604:C:T | 1.5E-03 | 0.0E+00 | Likely Pathogenic | p.Gly430Asp   | 3          | 0          | 1.0E-04       | 0             | 2.0E-04       |
| 6   | 161771356 | 6:161771356:A:G | 4.9E-04 | 0.0E+00 | Uncertain         | c.1286-113T>C | 1          | 0          | 0             | 0             | 0             |
| 6   | 161771358 | 6:161771358:C:A | 0.0E+00 | 2.0E-04 | Uncertain         | c.1286-115G>T | 0          | 1          | 0             | 0             | 0             |
| 6   | 161781200 | rs766915327:C:T | 4.9E-04 | 0.0E+00 | Likely Pathogenic | p.Arg402His   | 1          | 0          | 0             | 0             | 0             |
| 6   | 161781201 | rs55830907:G:A  | 1.5E-03 | 1.6E-03 | Benign            | p.Arg402Cys   | 3          | 8          | 1.3E-03       | 0             | 1.3E-03       |
| 6   | 161781208 | 6:161781208:C:T | 4.9E-04 | 0.0E+00 | Uncertain         | p.Glu399glu   | 1          | 0          | 0             | 0             | 0             |
| 6   | 161807881 | rs375036403:G:A | 0.0E+00 | 2.0E-04 | Uncertain         | p.Ala371Val   | 0          | 1          | 9.7E-05       | 0             | 1.0E-04       |
| 6   | 161969940 | rs753655327:C:T | 4.9E-04 | 0.0E+00 | Likely benign     | p.Pro343Pro   | 1          | 0          | 0             | 0             | 0             |
| 6   | 161969941 | rs529808032:G:A | 0.0E+00 | 2.0E-04 | Uncertain         | p.Pro343Leu   | 0          | 1          | 1.0E-04       | 0             | 3.0E-04       |
| 6   | 161969969 | rs199657839:G:A | 0.0E+00 | 2.0E-04 | Benign            | p.Arg334Cys   | 0          | 1          | 1.0E-04       | 0             | 6.7E-05       |
| 6   | 161970012 | rs144340740:A:G | 4.9E-04 | 4.1E-04 | Benign            | p.Gly319Gly   | 2          | 2          | 9.9E-03       | 0             | 6.7E-05       |
| 6   | 161990320 | rs115979402:C:A | 4.9E-04 | 0.0E+00 | Benign            | c.933+67G>T   | 2          | 0          | 1.1E-02       | 0             | 0             |
| 6   | 161990344 | rs77112335:T:C  | 3.4E-03 | 1.4E-03 | Benign            | c.933+43A>G   | 7          | 7          | 1.1E-02       | 0             | 1.0E-04       |
| 6   | 161990390 | rs72480423:C:G  | 0.0E+00 | 2.0E-04 | Uncertain         | p.Glu310Asp   | 0          | 1          | 2.0E-04       | 0             | 3.0E-04       |
| 6   | 161990401 | rs138920699:G:A | 0.0E+00 | 4.1E-04 | Uncertain         | p.Leu307Leu   | 0          | 2          | 1.6E-03       | 0             | 2.9E-03       |

| Chr | Pos       | SNP              | Freq A  | Freq C  | Sig               | Anno        | Count of A | Count of C | ALL genome AF | ASJ genome AF | NFE genome AF |
|-----|-----------|------------------|---------|---------|-------------------|-------------|------------|------------|---------------|---------------|---------------|
| 6   | 162206851 | rs769230602:C:T  | 0.0E+00 | 2.0E-04 | Likely Pathogenic | p.Arg275Gln | 0          | 1          | 0             | 0             | 0             |
| 6   | 162206852 | rs34424986:G:A   | 2.4E-03 | 2.9E-03 | Pathogenic        | p.Arg275Trp | 5          | 14         | 2.2E-03       | 0             | 3.3E-03       |
| 6   | 162206892 | rs9456711:T:C    | 1.5E-03 | 1.4E-03 | Benign            | p.Leu261Leu | 3          | 7          | 4.9E-02       | 0             | 4.0E-04       |
| 6   | 162206905 | 6:162206905:T:C  | 4.9E-04 | 0.0E+00 | Likely Pathogenic | p.His257Arg | 1          | 0          | 0             | 0             | 0             |
| 6   | 162206909 | rs150562946:G:A  | 4.9E-04 | 6.2E-04 | Uncertain         | p.Arg256Cys | 1          | 3          | 5.0E-04       | 0             | 8.0E-04       |
| 6   | 162206948 | rs765248676:G:A  | 5.0E-04 | 0.0E+00 | Uncertain         | c.735-8C>T  | 1          | 0          | 0             | 0             | 0             |
| 6   | 162206954 | rs200157467:G:C  | 5.0E-04 | 0.0E+00 | Uncertain         | c.735-14C>G | 1          | 0          | 3.2E-05       | 3.3E-03       | 0             |
| 6   | 162394349 | rs137853054:G:A  | 9.7E-04 | 6.1E-04 | Likely Pathogenic | p.Thr240Met | 2          | 3          | 1.0E-04       | 0             | 2.0E-04       |
| 6   | 162394449 | rs768779161:C:G  | 9.7E-04 | 4.1E-04 | Likely Pathogenic | p.Glu207Gln | 2          | 2          | 3.2E-05       | 0             | 6.7E-05       |
| 6   | 162394487 | rs576565848:C:T  | 0.0E+00 | 2.0E-04 | Uncertain         | c.619-38G>A | 0          | 1          | 0             | 0             | 0             |
| 6   | 162394492 | rs751186019:G:C  | 0.0E+00 | 2.0E-04 | Uncertain         | c.619-43C>G | 0          | 1          | 0             | 0             | 0             |
| 6   | 162475128 | 6:162475128:T:TA | 0.0E+00 | 2.0E-04 | Pathogenic        | p.Ser205Ter | 0          | 1          | 0             | 0             | 0             |
| 6   | 162475167 | rs9456735:T:G    | 0.0E+00 | 8.2E-04 | Benign            | p.Met192Leu | 0          | 4          | 1.7E-02       | 0             | 3.0E-04       |
| 6   | 162622166 | rs140590552:G:T  | 0.0E+00 | 1.0E-03 | Likely benign     | p.Thr177Thr | 0          | 5          | 3.2E-05       | 0             | 6.7E-05       |
| 6   | 162622175 | rs147121590:G:A  | 6.3E-03 | 2.9E-03 | Uncertain         | p.Leu174Leu | 13         | 14         | 9.0E-04       | 0             | 1.2E-03       |
| 6   | 162622179 | rs781608005:G:A  | 0.0E+00 | 2.0E-04 | Uncertain         | p.Thr173Met | 0          | 1          | 1.0E-04       | 0             | 1.0E-04       |

| Chr | Pos       | SNP                                                    | Freq A  | Freq C  | Sig               | Anno                      | Count of A | Count of C | ALL genome AF | ASJ genome AF | NFE genome AF |
|-----|-----------|--------------------------------------------------------|---------|---------|-------------------|---------------------------|------------|------------|---------------|---------------|---------------|
| 6   | 162622180 | rs749094429:T:C                                        | 0.0E+00 | 2.0E-04 | Uncertain         | p.Thr173Ala               | 0          | 1          | 1.0E-04       | 0             | 6.7E-05       |
| 6   | 162622216 | 6:162622216:T:C                                        | 4.9E-04 | 0.0E+00 | Likely Pathogenic | p.Lys161HGlu              | 1          | 0          | 0             | 0             | 0             |
| 6   | 162622239 | rs55654276:G:C                                         | 0.0E+00 | 2.0E-04 | Benign            | p.Pro153Arg               | 0          | 1          | 4.6E-03       | 0.0E+00       | 0.0E+00       |
| 6   | 162622262 | rs371890659:G:C                                        | 4.9E-04 | 4.1E-04 | Likely Pathogenic | p.Ser145Arg               | 1          | 2          | 0             | 0             | 0             |
| 6   | 162622309 | rs770006273:T:C                                        | 0.0E+00 | 2.0E-04 | Uncertain         | c.413-25A>G               | 0          | 1          | 9.7E-05       | 0             | 1.0E-04       |
| 6   | 162683592 | rs771529549:TCAGTGTGCAGATGACAGCCAGCCCCACAGAGTCTCCTGG:T | 4.9E-04 | 0.0E+00 | Uncertain         | p.Pro113ThrfsTer51        | 1          | 0          | 3.0E-04       | 0             | 5.0E-04       |
| 6   | 162683680 | rs373593750:G:A                                        | 0.0E+00 | 2.0E-04 | Uncertain         | p.Arg97Trp                | 0          | 1          | 3.2E-05       | 0             | 0             |
| 6   | 162683683 | rs377591051:C:T                                        | 4.9E-04 | 0.0E+00 | Uncertain         | p.Glu96Lys                | 1          | 0          | 0             | 0             | 0             |
| 6   | 162683693 | rs200256562:C:T                                        | 0.0E+00 | 4.1E-04 | Likely benign     | p.Ala92Ala                | 0          | 2          | 0             | 0             | 0             |
| 6   | 162683699 | rs767425151:G:A                                        | 4.9E-04 | 0.0E+00 | Uncertain         | p.Asn90Asn                | 1          | 0          | 9.7E-05       | 0             | 0             |
| 6   | 162683724 | rs55774500:G:T                                         | 0.0E+00 | 1.4E-03 | Benign            | p.Ala82Glu                | 0          | 7          | 2.6E-03       | 3.3E-03       | 3.0E-03       |
| 6   | 162683750 | rs139083077:C:T                                        | 4.9E-04 | 0.0E+00 | Uncertain         | p.Pro73Pro                | 1          | 0          | 3.3E-05       | 0             | 6.7E-05       |
| 6   | 162683759 | rs750338686:C:T                                        | 0.0E+00 | 2.1E-04 | Uncertain         | p.Val70Val                | 0          | 1          | 0             | 0             | 0             |
| 6   | 162683827 | 6:162683827:A:AAAAAAG                                  | 5.1E-04 | 0.0E+00 | Uncertain         | c.172-31_172-30insCTTTTTT | 1          | 0          | 0             | 0             | 0             |
| 6   | 162864307 | rs79752410:C:T                                         | 3.6E-03 | 5.0E-03 | Benign            | c.171+35G>A               | 7          | 23         | 5.1E-03       | 2.0E-02       | 3.7E-03       |

| Chr | Pos       | SNP               | Freq A  | Freq C  | Sig               | Anno             | Count of A | Count of C | ALL genome AF | ASJ genome AF | NFE genome AF |
|-----|-----------|-------------------|---------|---------|-------------------|------------------|------------|------------|---------------|---------------|---------------|
| 6   | 162864308 | rs374566506:G:A   | 5.1E-04 | 2.1E-04 | Uncertain         | c.171+34C>T      | 1          | 1          | 3.0E-04       | 0             | 4.0E-04       |
| 6   | 162864325 | rs370823431:C:T   | 0.0E+00 | 2.1E-04 | Uncertain         | c.171+17G>A      | 0          | 1          | 3.2E-05       | 0             | 0             |
| 6   | 162864339 | 6:162864339:C:A   | 5.1E-04 | 0.0E+00 | Uncertain         | c.171+3G>T       | 1          | 0          | 0             | 0             | 0             |
| 6   | 162864346 | rs137853059:A:T   | 5.1E-04 | 0.0E+00 | Likely Pathogenic | p.Val56Glu       | 1          | 0          | 6.5E-05       | 0             | 6.7E-05       |
| 6   | 162864388 | rs368134308:C:G   | 4.9E-04 | 0.0E+00 | Likely Pathogenic | p.Arg42Pro       | 1          | 0          | 0             | 0             | 0             |
| 6   | 162864402 | rs77795533:C:T    | 0.0E+00 | 6.1E-04 | Benign            | p.Pro37Pro       | 0          | 3          | 3.0E-02       | 0             | 5.0E-04       |
| 6   | 162864403 | rs148990138:G:A   | 0.0E+00 | 2.0E-04 | Uncertain         | p.Pro37Leu       | 0          | 1          | 1.0E-04       | 0             | 1.0E-04       |
| 6   | 162864410 | rs55777503:CC:T:C | 1.5E-03 | 0.0E+00 | Pathogenic        | p.Gln34ArgfsTer5 | 3          | 0          | 3.0E-04       | 0             | 2.0E-04       |
| 6   | 162864462 | rs148302761:G:A   | 0.0E+00 | 4.1E-04 | Uncertain         | p.Val17Val       | 0          | 2          | 9.7E-05       | 0             | 1.0E-04       |
| 6   | 162864465 | rs143477190:C:T   | 3.9E-03 | 1.6E-03 | Likely benign     | p.Glu16Glu       | 8          | 8          | 2.6E-03       | 0             | 6.7E-05       |
| 6   | 162864519 | rs769722629:T:C   | 4.9E-04 | 8.2E-04 | Uncertain         | c.8-14A>G        | 1          | 4          | 6.5E-05       | 0             | 1.0E-04       |
| 6   | 162864528 | rs201760977:A:G   | 4.9E-04 | 0.0E+00 | Likely benign     | c.8-23T>C        | 1          | 0          | 5.0E-04       | 0             | 0             |
| 6   | 162864536 | rs997012777:A:G   | 0.0E+00 | 2.0E-04 | Uncertain         | c.8-31T>C        | 0          | 1          | 0             | 0             | 0             |
| 6   | 162864548 | 6:162864548:C:A   | 0.0E+00 | 2.0E-04 | Uncertain         | c.8-43G>T        | 0          | 1          | 0             | 0             | 0             |
| 6   | 162864569 | rs548127850:T:A   | 4.9E-04 | 0.0E+00 | Uncertain         | c.8-64A>T        | 1          | 0          | 0             | 0             | 0             |
| 6   | 162864588 | rs548991430:A:G   | 4.9E-04 | 1.0E-03 | Uncertain         | c.8-83T>C        | 1          | 5          | 2.0E-04       | 0             | 1.0E-04       |

Columbia University

| Chr | Pos       | SNP                       | Freq A  | Freq C  | Sig           | Anno                       | Count of A | Count of C | ALL genome AF | ASJ genome AF | NFE genome AF |
|-----|-----------|---------------------------|---------|---------|---------------|----------------------------|------------|------------|---------------|---------------|---------------|
| 6   | 161769108 | rs752358219:A:G           | 5.3E-04 | 9.9E-04 | Uncertain     | c.*2023T>C                 | 1          | 1          | 3.0E-04       | 0             | 5.0E-04       |
| 6   | 161769181 | rs376011629:A:CTGTGTGCT:A | 5.3E-04 | 0.0E+00 | Benign        | c.*1941_*1949delAGCACACA G | 1          | 0          | 1.0E-02       | 0             | 6.7E-05       |
| 6   | 161769313 | rs114587790:C:T           | 0.0E+00 | 2.0E-03 | Likely benign | c.*1818G>A                 | 0          | 2          | 6.8E-03       | 0             | 1.0E-04       |
| 6   | 161769446 | rs187134044:T:C           | 5.3E-04 | 0.0E+00 | Uncertain     | c.*1685A>G                 | 1          | 0          | 7.0E-04       | 0             | 1.3E-03       |
| 6   | 161769669 | rs11961229:G:T            | 5.3E-04 | 9.9E-04 | Benign        | c.*1462C>A                 | 1          | 1          | 7.4E-03       | 0             | 0             |
| 6   | 161769710 | rs748283584:T:C           | 5.3E-04 | 0.0E+00 | Uncertain     | c.*1421A>G                 | 1          | 0          | 0             | 0             | 0             |
| 6   | 161769724 | rs11961237:G:A            | 5.3E-04 | 9.9E-04 | Benign        | c.*1407C>T                 | 1          | 1          | 7.3E-03       | 0             | 0             |
| 6   | 161769745 | rs140107485:T:C           | 2.1E-03 | 3.0E-03 | Uncertain     | c.*1386A>G                 | 4          | 3          | 1.5E-03       | 0             | 2.5E-03       |
| 6   | 161769748 | 6:161769748:A:G           | 5.3E-04 | 0.0E+00 | Uncertain     | c.*1383T>C                 | 1          | 0          | 0             | 0             | 0             |
| 6   | 161769810 | 6:161769810:C:T           | 0.0E+00 | 9.9E-04 | Uncertain     | c.*1321G>A                 | 0          | 1          | 0             | 0             | 0             |
| 6   | 161769850 | rs571904443:G:A           | 5.3E-03 | 9.9E-04 | Uncertain     | c.*1281C>T                 | 10         | 1          | 6.5E-05       | 3.3E-03       | 0             |
| 6   | 161769888 | rs961026516:G:T           | 5.4E-04 | 1.0E-03 | Uncertain     | c.*1243C>A                 | 1          | 1          | 2.0E-04       | 6.6E-03       | 2.0E-04       |
| 6   | 161769973 | 6:161769973:A:G           | 5.4E-04 | 0.0E+00 | Uncertain     | c.*1158T>C                 | 1          | 0          | 0             | 0             | 0             |
| 6   | 161770003 | rs770498017:G:C           | 5.3E-04 | 0.0E+00 | Uncertain     | c.*1128C>G                 | 1          | 0          | 0             | 0             | 0             |
| 6   | 161770153 | rs1039492436:A:G          | 0.0E+00 | 1.0E-03 | Uncertain     | c.*978T>C                  | 0          | 1          | 0             | 0             | 0             |
| 6   | 161770240 | rs572345942:TTATC:T       | 7.9E-03 | 4.0E-03 | Uncertain     | c.*890_*887delGATA         | 15         | 4          | 4.8E-03       | 0             | 6.7E-03       |
| 6   | 161770307 | 6:161770307:A:G           | 0.0E+00 | 9.9E-04 | Uncertain     | c.*824T>C                  | 0          | 1          | 0             | 0             | 0             |



| Chr | Pos       | SNP                 | Freq A  | Freq C  | Sig           | Anno            | Count of A | Count of C | ALL genome AF | ASJ genome AF | NFE genome AF |
|-----|-----------|---------------------|---------|---------|---------------|-----------------|------------|------------|---------------|---------------|---------------|
| 6   | 161770726 | rs756738207:A:G     | 0.0E+00 | 9.9E-04 | Uncertain     | c.*405T>C       | 0          | 1          | 1.0E-04       | 0             | 1.0E-04       |
| 6   | 161770751 | 6:161770751:C:G     | 5.3E-04 | 0.0E+00 | Uncertain     | c.*380G>C       | 1          | 0          | 0             | 0             | 0             |
| 6   | 161771010 | rs557142572:T:G     | 1.6E-03 | 0.0E+00 | Uncertain     | c.*121A>C       | 3          | 0          | 3.2E-05       | 0             | 0             |
| 6   | 161771037 | 6:161771037:T:G:del | 5.3E-04 | 0.0E+00 | Uncertain     | c.*94_*93delC A | 1          | 0          | 0             | 0             | 0             |
| 6   | 161771039 | rs545573732:T:C     | 5.3E-04 | 0.0E+00 | Uncertain     | c.*92A>G        | 1          | 0          | 6.0E-04       | 0             | 8.0E-04       |
| 6   | 161771071 | rs553007666:G:T     | 0.0E+00 | 2.0E-03 | Uncertain     | c.*60C>A        | 0          | 2          | 1.0E-04       | 0             | 0             |
| 6   | 161771157 | rs182893847:T:G     | 5.3E-04 | 0.0E+00 | Uncertain     | p.Met458Leu     | 1          | 0          | 2.0E-04       | 0             | 1.0E-04       |
| 6   | 161771219 | rs149953814:G:A     | 4.8E-03 | 3.0E-03 | Uncertain     | p.Pro437Leu     | 10         | 3          | 1.4E-03       | 0             | 2.3E-03       |
| 6   | 161771247 | rs202021008:T:C     | 0.0E+00 | 9.9E-04 | Uncertain     | c.1286-4A>G     | 0          | 1          | 0             | 0             | 0             |
| 6   | 161771266 | 6:161771266:G:A     | 0.0E+00 | 9.9E-04 | Uncertain     | c.1286-23C>T    | 0          | 1          | 3.2E-05       | 0             | 0             |
| 6   | 161771325 | 6:161771325:C:G     | 0.0E+00 | 9.9E-04 | Uncertain     | c.1286-82G>C    | 0          | 1          | 0             | 0             | 0             |
| 6   | 161781074 | rs920265563:C:A     | 5.3E-04 | 0.0E+00 | Uncertain     | c.1285+46G>T    | 1          | 0          | 0             | 0             | 0             |
| 6   | 161781146 | rs531247345:C:T     | 5.3E-04 | 0.0E+00 | Uncertain     | p.Arg420His     | 1          | 0          | 3.2E-05       | 0             | 6.7E-05       |
| 6   | 161781201 | rs55830907:G:A      | 1.1E-03 | 9.9E-04 | Benign        | p.Arg402Cys     | 2          | 1          | 1.3E-03       | 0             | 1.3E-03       |
| 6   | 161781242 | 6:161781242:G:A     | 0.0E+00 | 9.9E-04 | Uncertain     | c.1168-5C>T     | 0          | 1          | 0             | 0             | 0             |
| 6   | 161807874 | 6:161807874:A:G     | 0.0E+00 | 9.9E-04 | Uncertain     | p.His373His     | 0          | 1          | 0             | 0             | 0             |
| 6   | 161807897 | rs56092260:G:A      | 5.3E-04 | 0.0E+00 | Uncertain     | p.Arg366Trp     | 1          | 0          | 3.0E-04       | 0             | 0             |
| 6   | 161969868 | rs777171316:G:A     | 5.3E-04 | 0.0E+00 | Likely benign | c.1083+18C>T    | 1          | 0          | 2.0E-04       | 0             | 0             |

| Chr | Pos       | SNP             | Freq A  | Freq C  | Sig               | Anno        | Count of A | Count of C | ALL genome AF | ASJ genome AF | NFE genome AF |
|-----|-----------|-----------------|---------|---------|-------------------|-------------|------------|------------|---------------|---------------|---------------|
| 6   | 161969941 | rs529808032:G:A | 1.1E-03 | 0.0E+00 | Uncertain         | p.Pro343Leu | 2          | 0          | 1.0E-04       | 0             | 3.0E-04       |
| 6   | 161969952 | rs546676036:C:T | 5.3E-04 | 0.0E+00 | Benign            | p.Ala339Ala | 1          | 0          | 3.2E-05       | 0             | 0             |
| 6   | 161969969 | rs199657839:G:A | 5.3E-04 | 0.0E+00 | Benign            | p.Arg334Cys | 1          | 0          | 1.0E-04       | 0             | 6.7E-05       |
| 6   | 161970012 | rs144340740:A:G | 5.3E-04 | 9.9E-04 | Benign            | p.Gly319Gly | 1          | 1          | 9.9E-03       | 0             | 6.7E-05       |
| 6   | 161990320 | rs115979402:C:A | 0.0E+00 | 9.9E-04 | Benign            | c.933+67G>T | 0          | 1          | 1.1E-02       | 0             | 0             |
| 6   | 161990326 | rs188958137:C:T | 5.3E-04 | 0.0E+00 | Uncertain         | c.933+61G>A | 1          | 0          | 9.7E-05       | 0             | 1.0E-04       |
| 6   | 161990344 | rs77112335:T:C  | 1.6E-03 | 9.9E-04 | Benign            | c.933+43A>G | 3          | 1          | 1.1E-02       | 0             | 1.0E-04       |
| 6   | 161990401 | rs138920699:G:A | 5.3E-04 | 1.0E-03 | Uncertain         | p.Leu307Leu | 1          | 1          | 1.6E-03       | 0             | 2.9E-03       |
| 6   | 161990493 | rs371634667:G:A | 0.0E+00 | 9.9E-04 | Uncertain         | c.872-45C>T | 0          | 1          | 3.2E-05       | 0             | 6.7E-05       |
| 6   | 161990506 | rs143283042:T:C | 1.6E-03 | 1.0E-03 | Benign            | c.872-58A>G | 3          | 1          | 6.7E-03       | 0             | 6.7E-05       |
| 6   | 161990508 | rs150733619:C:G | 1.6E-03 | 1.0E-03 | Benign            | c.872-60G>C | 3          | 1          | 6.6E-03       | 0             | 0             |
| 6   | 162206852 | rs34424986:G:A  | 1.6E-03 | 2.0E-03 | Pathogenic        | p.Arg275Trp | 3          | 2          | 2.2E-03       | 0             | 3.3E-03       |
| 6   | 162206859 | rs143902760:G:A | 5.3E-04 | 0.0E+00 | Benign            | p.Leu272Leu | 1          | 0          | 0             | 0             | 0             |
| 6   | 162206900 | rs750325162:T:C | 0.0E+00 | 1.0E-03 | Likely Pathogenic | p.Ile259Val | 0          | 1          | 0             | 0             | 0             |
| 6   | 162206948 | rs765248676:G:A | 5.9E-04 | 0.0E+00 | Uncertain         | c.735-8C>T  | 1          | 0          | 0             | 0             | 0             |
| 6   | 162206954 | rs200157467:G:C | 2.4E-03 | 0.0E+00 | Uncertain         | c.735-14C>G | 4          | 0          | 3.2E-05       | 3.3E-03       | 0             |
| 6   | 162394349 | rs137853054:G:A | 0.0E+00 | 2.0E-03 | Likely Pathogenic | p.Thr240Met | 0          | 2          | 1.0E-04       | 0             | 2.0E-04       |

| Chr | Pos       | SNP             | Freq A  | Freq C  | Sig               | Anno        | Count of A | Count of C | ALL genome AF | ASJ genome AF | NFE genome AF |
|-----|-----------|-----------------|---------|---------|-------------------|-------------|------------|------------|---------------|---------------|---------------|
| 6   | 162394354 | rs114974496:G:A | 5.3E-04 | 9.9E-04 | Likely benign     | p.Cys238Cys | 1          | 1          | 3.6E-03       | 0             | 6.7E-05       |
| 6   | 162394379 | rs571490973:G:A | 5.3E-04 | 0.0E+00 | Uncertain         | p.Ala230Val | 1          | 0          | 0             | 0             | 0             |
| 6   | 162394381 | rs758048810:G:A | 5.3E-04 | 0.0E+00 | Uncertain         | p.Ile229Ile | 1          | 0          | 0             | 0             | 0             |
| 6   | 162475106 | rs780523707:T:G | 5.3E-04 | 0.0E+00 | Uncertain         | c.618+17A>C | 1          | 0          | 3.2E-05       | 0             | 0             |
| 6   | 162475167 | rs9456735:T:G   | 4.2E-03 | 5.0E-03 | Benign            | p.Met192Leu | 8          | 4          | 1.7E-02       | 0             | 3.0E-04       |
| 6   | 162475268 | 6:162475268:C:T | 5.3E-04 | 0.0E+00 | Uncertain         | c.535-62G>A | 1          | 0          | 0             | 0             | 0             |
| 6   | 162475280 | 6:162475280:T:A | 5.3E-04 | 0.0E+00 | Uncertain         | c.535-74A>T | 1          | 0          | 0             | 0             | 0             |
| 6   | 162622175 | rs147121590:G:A | 1.1E-03 | 1.0E-03 | Uncertain         | p.Leu174Leu | 2          | 1          | 9.0E-04       | 0             | 1.2E-03       |
| 6   | 162622180 | rs749094429:T:C | 5.3E-04 | 0.0E+00 | Uncertain         | p.Thr173Ala | 1          | 0          | 1.0E-04       | 0             | 6.7E-05       |
| 6   | 162622239 | rs55654276:G:C  | 1.1E-03 | 0.0E+00 | Benign            | p.Pro153Arg | 2          | 0          | 4.6E-03       | 0             | 0             |
| 6   | 162622250 | 6:162622250:A:G | 5.3E-04 | 0.0E+00 | Uncertain         | p.Tyr149Tyr | 1          | 0          | 0             | 0             | 0             |
| 6   | 162622262 | rs371890659:G:C | 5.3E-04 | 0.0E+00 | Likely Pathogenic | p.Ser145Arg | 1          | 0          | 0             | 0             | 0             |
| 6   | 162683724 | rs55774500:G:T  | 2.1E-03 | 2.0E-03 | Benign            | p.Ala82Glu  | 4          | 2          | 2.6E-03       | 3.3E-03       | 3.0E-03       |
| 6   | 162864378 | rs763638925:G:A | 5.3E-04 | 0.0E+00 | Uncertain         | p.Phe45Phe  | 1          | 0          | 6.5E-05       | 0             | 0             |
| 6   | 162864389 | rs577232474:G:A | 5.3E-04 | 0.0E+00 | Likely Pathogenic | p.Arg42Cys  | 1          | 0          | 0             | 0             | 0             |
| 6   | 162864402 | rs77795533:C:T  | 3.7E-03 | 3.0E-03 | Benign            | p.Pro37Pro  | 7          | 3          | 3.0E-02       | 0             | 5.0E-04       |
| 6   | 162864403 | rs148990138:G:A | 5.3E-04 | 0.0E+00 | Uncertain         | p.Pro37Leu  | 1          | 0          | 1.0E-04       | 0             | 1.0E-04       |

| Chr                  | Pos       | SNP                  | Freq A  | Freq C  | Sig               | Anno                | Count of A | Count of C | ALL genome AF | ASJ genome AF | NFE genome AF |
|----------------------|-----------|----------------------|---------|---------|-------------------|---------------------|------------|------------|---------------|---------------|---------------|
| 6                    | 162864410 | rs55777503:CC T:C    | 5.3E-04 | 0.0E+00 | Pathogenic        | p.Gln34ArgfsTer5    | 1          | 0          | 3.0E-04       | 0             | 2.0E-04       |
| 6                    | 162864415 | rs147757966:C:T      | 5.3E-04 | 0.0E+00 | Likely Pathogenic | p.Arg33Gln          | 1          | 0          | 6.5E-05       | 0             | 6.7E-05       |
| 6                    | 162864465 | rs143477190:C:T      | 5.3E-04 | 9.9E-04 | Likely benign     | p.Glu16Glu          | 1          | 1          | 2.6E-03       | 0             | 6.7E-05       |
| 6                    | 162864522 | rs552574625:G:T      | 5.3E-04 | 9.9E-04 | Uncertain         | c.8-17C>A           | 1          | 1          | 0             | 0             | 0             |
| 6                    | 162864528 | rs201760977:A:G      | 0.0E+00 | 9.9E-04 | Likely benign     | c.8-23T>C           | 0          | 1          | 5.0E-04       | 0             | 0             |
| Sheba Medical Center |           |                      |         |         |                   |                     |            |            |               |               |               |
| 6                    | 161769745 | rs140107485:T:C      | 3.1E-03 | 9.7E-04 | Uncertain         | c.*1386A>G          | 4          | 1          | 1.5E-03       | 0.0E+00       | 2.5E-03       |
| 6                    | 161769850 | rs571904443:G:A      | 1.2E-02 | 5.8E-03 | Uncertain         | c.*1281C>T          | 15         | 6          | 6.5E-05       | 3.3E-03       | 0             |
| 6                    | 161769854 | 6:161769854:T:C      | 0.0E+00 | 9.7E-04 | Uncertain         | c.*1277A>G          | 0          | 1          | 0             | 0             | 0             |
| 6                    | 161769888 | rs961026516:G:T      | 3.1E-03 | 4.8E-03 | Uncertain         | c.*1243C>A          | 4          | 5          | 2.0E-04       | 6.6E-03       | 2.0E-04       |
| 6                    | 161769931 | 6:161769931:C:A      | 0.0E+00 | 9.7E-04 | Uncertain         | c.*1200G>T          | 0          | 1          | 0             | 0             | 0             |
| 6                    | 161769958 | rs916775178:A:G      | 7.7E-04 | 0.0E+00 | Uncertain         | c.*1173T>C          | 1          | 0          | 0             | 0             | 0             |
| 6                    | 161769973 | 6:161769973:A:G      | 0.0E+00 | 9.7E-04 | Uncertain         | c.*1158T>C          | 0          | 1          | 0             | 0             | 0             |
| 6                    | 161770111 | rs563261042:G:A      | 7.7E-04 | 0.0E+00 | Uncertain         | c.*1020C>T          | 1          | 0          | 6.5E-05       | 0             | 0             |
| 6                    | 161770240 | rs572345942:TT ATC:T | 5.4E-03 | 2.9E-03 | Uncertain         | c.*890_*887del GATA | 7          | 3          | 4.8E-03       | 0             | 6.7E-03       |
| 6                    | 161771023 | rs984344247:T:C      | 0.0E+00 | 0.0E+00 | Uncertain         | c.*108A>G           | 1          | 0          | 3.2E-05       | 0             | 0             |
| 6                    | 161771347 | 6:161771347:A:G      | 0.0E+00 | 9.7E-04 | Uncertain         | c.1286-104T>C       | 0          | 1          | 0             | 0             | 0             |
| 6                    | 161771349 | 6:161771349:A:C      | 0.0E+00 | 9.7E-04 | Uncertain         | c.1286-106T>G       | 0          | 1          | 0             | 0             | 0             |

| Chr | Pos       | SNP                     | Freq A  | Freq C  | Sig        | Anno                     | Count of A | Count of C | ALL genome AF | ASJ genome AF | NFE genome AF |
|-----|-----------|-------------------------|---------|---------|------------|--------------------------|------------|------------|---------------|---------------|---------------|
| 6   | 161771351 | 6:161771351:T:C         | 0.0E+00 | 9.7E-04 | Uncertain  | c.1286-108A>G            | 0          | 1          | 0             | 0             | 0             |
| 6   | 161771357 | 6:161771357:G:T         | 7.7E-04 | 0.0E+00 | Uncertain  | c.1286-114C>A            | 1          | 0          | 0             | 0             | 0             |
| 6   | 161781201 | rs55830907:G:A          | 7.7E-04 | 0.0E+00 | Benign     | p.Arg402Cys              | 1          | 0          | 1.3E-03       | 0             | 1.3E-03       |
| 6   | 161970057 | rs200796582:T:C         | 7.7E-04 | 0.0E+00 | Benign     | c.934-22A>G              | 1          | 0          | 5.0E-04       | 0             | 9.0E-04       |
| 6   | 161990341 | 6:161990341:C:T         | 0.0E+00 | 9.7E-04 | Uncertain  | c.933+46G>A              | 0          | 1          | 0             | 0             | 0             |
| 6   | 161990401 | rs138920699:G:A         | 0.0E+00 | 9.7E-04 | Uncertain  | p.Leu307Leu              | 0          | 1          | 1.6E-03       | 0             | 2.9E-03       |
| 6   | 161990510 | 6:161990510:TA:T        | 7.7E-04 | 0.0E+00 | Uncertain  | c.872-63delT             | 1          | 0          | 0             | 0             | 0             |
| 6   | 162206852 | rs34424986:G:A          | 0.0E+00 | 9.7E-04 | Pathogenic | p.Arg275Trp              | 0          | 1          | 2.2E-03       | 0             | 3.3E-03       |
| 6   | 162206948 | rs765248676:G:A         | 8.0E-04 | 0.0E+00 | Uncertain  | c.735-8C>T               | 1          | 0          | 0             | 0             | 0             |
| 6   | 162206954 | rs200157467:G:C         | 2.4E-03 | 2.0E-03 | Uncertain  | c.735-14C>G              | 3          | 2          | 3.2E-05       | 3.3E-03       | 0             |
| 6   | 162394495 | 6:162394495:C:T         | 7.7E-04 | 0.0E+00 | Uncertain  | c.619-46G>A              | 1          | 0          | 0             | 0             | 0             |
| 6   | 162683722 | rs141825163:T:C         | 1.5E-03 | 0.0E+00 | Uncertain  | p.Thr83Ala               | 2          | 0          | 1.0E-04       | 3.3E-03       | 2.0E-04       |
| 6   | 162683724 | rs55774500:G:T          | 7.7E-04 | 1.9E-03 | Benign     | p.Ala82Glu               | 1          | 2          | 2.6E-03       | 3.3E-03       | 3.0E-03       |
| 6   | 162683839 | 6:162683839:AA TGTC:del | 7.7E-04 | 1.9E-03 | Uncertain  | c.172-47_172-42delGACATT | 1          | 2          | 0             | 0             | 0             |
| 6   | 162864402 | rs77795533:C:T          | 0.0E+00 | 9.7E-04 | Benign     | p.Pro37Pro               | 0          | 1          | 3.0E-02       | 0             | 5.0E-04       |
| 6   | 162864540 | rs761274077:G:A         | 7.7E-04 | 0.0E+00 | Uncertain  | c.8-35C>T                | 1          | 0          | 3.2E-05       | 0             | 0             |

Abbreviations: Chr—Chromosome; Pos—Position; SNP—Single Nucleotide Polymorphism; Freq A—Frequency in Affected; Freq C—Frequency in Controls; Sig—Clinical Significance according to Varsome; Anno—Annotation; Count of A—Count of Affected; Count of C—Count of Controls; ALL genome AF—GnomAD genome allele frequency in all population; ASJ genome AF— GnomAD genome allele frequency in Ashkenazi Jewish population; NFE genome AF—GnomAD genome allele frequency in non-Finnish European population.

**Table S2. CNV detection methods parameters and performance compared to MLPA**

| Methods      | Parameters                                                                   | TP | FP  | TN  | FN | Avail    | FDR (%) | Sens (%) | Spe (%) |
|--------------|------------------------------------------------------------------------------|----|-----|-----|----|----------|---------|----------|---------|
| ExomeDepth   | transition.probability = $1 \times 10^{-6}$<br>expected.CNV.length = 100,000 | 36 | 16  | 385 | 1  | 438 /510 | 31      | 97       | 96      |
| panelCN.MOPS | Default                                                                      | 42 | 215 | 252 | 1  | 510 /510 | 84      | 98       | 54      |

Abbreviations: CNV—copy Number Variation; MLPA—Multiplex Ligation-dependent Probe Amplification; TP—True Positive; FP—False Positive; TN—True Negative; FN—False Negative; Availability—available samples that passed quality control; FDR—False-discovery rate; Sens—Sensitivity; Spe—Specificity.

**Table S3. PRKN CNV carriers in cases and controls.**

| Sample | CNV                             | Zyg | Status | Sex | AAS | Cohort   | AAO |
|--------|---------------------------------|-----|--------|-----|-----|----------|-----|
| S29263 | Exon 3 deletion                 | Het | A      | F   | 41  | McGill   | NA  |
| S29254 | Exon 3 deletion                 | Hom | A      | M   | 57  | McGill   | NA  |
| S29243 | Exon 9 duplication              | Het | A      | M   | 38  | McGill   | 28  |
| S20936 | Exon 2 deletion                 | Het | A      | NA  | 56  | McGill   | 29  |
| S35319 | Exon 3 deletion                 | Hom | A      | M   | 35  | McGill   | 29  |
| S29943 | Exon 4 deletion                 | Het | A      | M   | 47  | McGill   | 34  |
| S06128 | Exon 3, 4 deletion              | Het | A      | M   | 44  | McGill   | 39  |
| S06163 | Exon 2 duplication              | Het | A      | F   | 51  | McGill   | 41  |
| S34223 | Exon 3 deletion                 | Het | A      | M   | 55  | McGill   | 53  |
| S29772 | Exon 3, 4 deletion              | Het | A      | F   | 68  | McGill   | 64  |
| S35169 | Exon 2, 3, 4 duplication        | Het | A      | M   | NA  | McGill   | 64  |
| S27094 | Exon 3, 4 deletion              | Het | A      | M   | 88  | McGill   | 68  |
| S06087 | Exon 3, 4 deletion              | Het | A      | F   | 74  | McGill   | 73  |
| S35181 | Exon 9 duplication              | Het | A      | F   | NA  | McGill   | 85  |
| S21652 | Exon 2 duplication              | Het | C      | M   | 73  | McGill   | NA  |
| S32929 | Exon 2 deletion                 | Het | C      | M   | 48  | McGill   | NA  |
| S33018 | Exon 2 deletion                 | Het | C      | F   | 72  | McGill   | NA  |
| S02762 | Exon 3 deletion                 | Het | C      | F   | 46  | McGill   | NA  |
| S05433 | Exon 6 deletion                 | Het | C      | F   | 23  | McGill   | NA  |
| S05512 | Exon 2 deletion                 | Het | C      | M   | 34  | McGill   | NA  |
| S32915 | Exon 3 deletion                 | Het | C      | F   | 54  | McGill   | NA  |
| S21514 | Exon 6, 7, 8, 9, 10 duplication | Het | C      | F   | 81  | McGill   | NA  |
| S28305 | Exon 2 duplication              | Het | C      | F   | NA  | McGill   | NA  |
| S32268 | Exon 3, 4 deletion              | Het | C      | F   | 59  | McGill   | NA  |
| S36521 | Exon 3 deletion                 | Het | C      | M   | NA  | McGill   | NA  |
| S36595 | Exon 3 deletion                 | Het | C      | M   | NA  | McGill   | NA  |
| S23082 | Exon 3, 4 deletion              | Hom | A      | F   | 54  | Columbia | 16  |
| S22919 | Exon 3, 4 deletion              | Het | A      | M   | 52  | Columbia | 19  |
| S23324 | Exon 3 deletion                 | Het | A      | F   | 70  | Columbia | 28  |
| S38184 | Exon 2 deletion                 | Het | A      | F   | 41  | Columbia | 31  |
| S38056 | Exon 2 duplication              | Het | A      | M   | 45  | Columbia | 33  |
| S38120 | Exon 2 duplication              | Het | A      | F   | 39  | Columbia | 33  |
| S33552 | Exon 2 deletion                 | Het | A      | M   | 36  | Columbia | 34  |
| S33346 | Exon 3, 4 deletion              | Hom | A      | M   | 37  | Columbia | 37  |
| S22965 | Exon 3, 4 deletion              | Het | A      | F   | 64  | Columbia | 38  |
| S22969 | Exon 3, 4 deletion              | Het | A      | F   | 63  | Columbia | 38  |
| S33435 | Exon 4 deletion                 | Het | A      | M   | 44  | Columbia | 38  |
| S33572 | Exon 3 duplication              | Het | A      | M   | 56  | Columbia | 41  |

| <b>Sample</b> | <b>CNV</b>               | <b>Zyg</b> | <b>Status</b> | <b>Sex</b> | <b>AAS</b> | <b>Cohort</b> | <b>AAO</b> |
|---------------|--------------------------|------------|---------------|------------|------------|---------------|------------|
| S22587        | Exon 3 duplication       | Het        | A             | M          | 47         | Columbia      | 47         |
| S33609        | Exon 2, 3, 4 deletion    | Het        | A             | F          | 63         | Columbia      | 52         |
| S23201        | Exon 2 duplication       | Het        | A             | M          | 62         | Columbia      | 54         |
| S22906        | Exon 2 duplication       | Het        | A             | M          | 63         | Columbia      | 63         |
| S22645        | Exon 2 duplication       | Het        | C             | F          | 45         | Columbia      | NA         |
| S22703        | Exon 2, 3 duplication    | Het        | C             | F          | 66         | Columbia      | NA         |
| S23029        | Exon 7 duplication       | Het        | C             | F          | 74         | Columbia      | NA         |
| S31155        | Exon 5 deletion          | Het        | C             | M          | 60         | Columbia      | NA         |
| S31170        | Exon 5 deletion          | Het        | C             | F          | 42         | Columbia      | NA         |
| S34477        | Exon 11,12 deletion      | Het        | C             | M          | 62         | Columbia      | NA         |
| S34490        | Exon 2, 3, 4 duplication | Het        | C             | M          | 73         | Columbia      | NA         |
| S34561        | Exon 12 deletion         | Het        | C             | F          | 71         | Columbia      | NA         |
| S35106        | Exon 2 duplication       | Het        | A             | M          | 73         | Sheba         | 69         |
| S29449        | Exon 3, 4 deletion       | Het        | A             | M          | 75         | Sheba         | 74         |
| S28720        | Exon 4 duplication       | Het        | C             | F          | 38         | Sheba         | NA         |

Samples are sorted by cohort and age at onset.

Abbreviations: CNV—Copy Number Variation; Zyg—Zygosity; AAS—Age At Sample; AAO—Age At Onset; Het—Heterozygote; Hom—Homozygote; A—Affected; C—Control; M—Male; F—Female; NA—Not Available.



**Table S4. Rare *PRKN* heterozygous SNVs and CNVs analysis for risk of PD using SKAT-O in different variant groups**

|                      | <i>P</i> -values |             |                 |             |                    |             |                       |             |
|----------------------|------------------|-------------|-----------------|-------------|--------------------|-------------|-----------------------|-------------|
|                      | Rare CADD        |             | Rare functional |             | Rare nonsynonymous |             | Rare loss-of-function |             |
|                      | SKAT-O           | SKAT Burden | SKAT-O          | SKAT Burden | SKAT-O             | SKAT Burden | SKAT-O                | SKAT Burden |
| McGill University    |                  |             |                 |             |                    |             |                       |             |
| SNV                  | 0.38             | 0.24        | 0.29            | 0.17        | 0.23               | 0.13        | 0.81                  | 0.77        |
| CNV                  | NA               | NA          | NA              | NA          | NA                 | NA          | 0.90                  | 0.85        |
| SNV & CNV            | 0.38             | 0.24        | 0.29            | 0.17        | 0.23               | 0.13        | 0.81                  | 0.57        |
| Patho SNV            | 0.62             | 0.83        | 0.64            | 0.67        | 0.62               | 0.83        | 0.81                  | 0.77        |
| Patho SNV & CNV      | 0.69             | 0.50        | 0.99            | 0.81        | 0.85               | 0.68        | 0.81                  | 0.77        |
| No Benign SNV        | 0.62             | 0.83        | 0.64            | 0.67        | 0.62               | 0.83        | 0.81                  | 0.57        |
| No Benign SNV & CNV  | 0.69             | 0.50        | 0.99            | 0.81        | 0.85               | 0.68        | 0.81                  | 0.57        |
| Columbia University  |                  |             |                 |             |                    |             |                       |             |
| SNV                  | 0.48             | 0.67        | 0.54            | 0.77        | 0.54               | 0.77        | NA                    | NA          |
| CNV                  | NA               | NA          | NA              | NA          | NA                 | NA          | 0.07                  | 0.04        |
| SNV & CNV            | 0.48             | 0.67        | 0.54            | 0.77        | 0.54               | 0.77        | 0.07                  | 0.04        |
| Patho SNV            | 0.12             | 0.07        | 0.12            | 0.07        | 0.12               | 0.07        | NA                    | NA          |
| Patho SNV & CNV      | 0.25             | 0.98        | 0.25            | 0.98        | 0.25               | 0.98        | NA                    | NA          |
| No Benign SNV        | 0.12             | 0.07        | 0.12            | 0.07        | 0.12               | 0.07        | 0.07                  | 0.04        |
| No Benign SNV & CNV  | 0.25             | 0.98        | 0.25            | 0.98        | 0.25               | 0.98        | 0.07                  | 0.04        |
| Sheba Medical Center |                  |             |                 |             |                    |             |                       |             |
| SNV                  | 0.70             | 0.68        | 0.52            | 0.41        | 0.52               | 0.41        | NA                    | NA          |
| CNV                  | NA               | NA          | NA              | NA          | NA                 | NA          | 0.61                  | 0.61        |
| SNV & CNV            | 0.70             | 0.68        | 0.52            | 0.41        | 0.52               | 0.41        | 0.61                  | 0.61        |

|                     |      |      |      |      |      |      |      |      |      |
|---------------------|------|------|------|------|------|------|------|------|------|
| Patho SNV           | 0.61 | 0.61 | 0.61 | 0.61 | 0.61 | 0.61 | 0.61 | NA   | NA   |
| Patho SNV & CNV     | 0.61 | 0.61 | 0.62 | 0.61 | 0.62 | 0.61 | 0.61 | NA   | NA   |
| No Benign SNV       | 0.61 | 0.61 | 0.61 | 0.61 | 0.61 | 0.61 | 0.61 | 0.61 | 0.61 |
| No Benign SNV & CNV | 0.61 | 0.61 | 0.62 | 0.61 | 0.62 | 0.61 | 0.61 | 0.61 | 0.61 |
| Meta-Analysis       |      |      |      |      |      |      |      |      |      |
| SNV                 | 0.75 | 0.54 | 0.69 | 0.48 | 0.63 | 0.42 | 0.53 | 0.53 | 0.50 |
| CNV                 | NA   | NA   | NA   | NA   | NA   | NA   | NA   | 0.18 | 0.11 |
| SNV & CNV           | 0.75 | 0.54 | 0.69 | 0.48 | 0.63 | 0.42 | 0.28 | 0.28 | 0.17 |
| Patho SNV           | 0.56 | 0.39 | 0.57 | 0.50 | 0.56 | 0.39 | 0.53 | 0.53 | 0.50 |
| Patho SNV & CNV     | 0.80 | 0.61 | 0.85 | 0.85 | 0.84 | 0.76 | 0.53 | 0.53 | 0.50 |
| No Benign SNV       | 0.56 | 0.39 | 0.57 | 0.50 | 0.56 | 0.39 | 0.30 | 0.30 | 0.17 |
| No Benign SNV & CNV | 0.80 | 0.61 | 0.85 | 0.85 | 0.84 | 0.76 | 0.30 | 0.30 | 0.17 |

Abbreviations: SNV—Single Nucleotide Variant; CNV—Copy Number Variation; PD—Parkinson's Disease; Patho—pathogenic and likely pathogenic variants; No Benign—analysis excluding benign and likely benign variants; NA—not applicable, not enough variants for analysis.

a After Bonferroni correction, alpha = .0009 (56 tests)

**Table S5. Rare *PRKN* heterozygous SNVs and CNVs analysis for Age at Onset of PD in different variant groups**

|                     | Rare CADD |             |                      |                       | Rare functional |             |                      |                       | Rare nonsynonymous |             |                      |                       | Rare loss-of-function |             |                       |                       |
|---------------------|-----------|-------------|----------------------|-----------------------|-----------------|-------------|----------------------|-----------------------|--------------------|-------------|----------------------|-----------------------|-----------------------|-------------|-----------------------|-----------------------|
|                     | AAO with  | AAO without | Coeff (95% CI)       | <i>P</i> <sup>a</sup> | AAO with        | AAO without | Coeff (95% CI)       | <i>P</i> <sup>a</sup> | AAO with           | AAO without | Coeff (95% CI)       | <i>P</i> <sup>a</sup> | AAO with              | AAO without | Coeff (95% CI)        | <i>P</i> <sup>a</sup> |
| McGill University   |           |             |                      |                       |                 |             |                      |                       |                    |             |                      |                       |                       |             |                       |                       |
| SNV                 | 58.50     | 59.12       | -0.61 (-6.69, 5.47)  | 0.84                  | 59.43           | 59.10       | 0.38 (-5.26, 6.02)   | 0.90                  | 58.31              | 59.12       | -0.79 (-6.63, 5.06)  | 0.79                  | 74.00                 | 59.08       | 15.24 (-5.62, 36.10)  | 0.15                  |
| CNV                 | NA        | NA          | NA                   | NA                    | NA              | NA          | NA                   | NA                    | NA                 | NA          | NA                   | NA                    | 57.00                 | 59.11       | -2.73 (-17.55, 12.09) | 0.72                  |
| SNV & CNV           | 58.50     | 59.12       | -0.61 (-6.69, 5.47)  | 0.84                  | 59.43           | 59.10       | 0.38 (-5.26, 6.02)   | 0.90                  | 58.31              | 59.12       | -0.79 (-6.63, 5.06)  | 0.79                  | 62.67                 | 59.09       | 3.28 (-8.80, 15.37)   | 0.59                  |
| Patho SNV           | 53.86     | 59.16       | -5.26 (-13.18, 2.66) | 0.19                  | 56.38           | 59.14       | -2.68 (-10.11, 4.74) | 0.48                  | 53.86              | 59.16       | -5.26 (-13.18, 2.66) | 0.19                  | 74.00                 | 59.08       | 15.24 (-5.62, 36.10)  | 0.15                  |
| Patho SNV & CNV     | 56.64     | 59.15       | -2.53 (-8.88, 3.81)  | 0.43                  | 57.92           | 59.13       | -1.18 (-7.02, 4.67)  | 0.69                  | 56.58              | 59.15       | -2.56 (-8.64, 3.51)  | 0.41                  | 74.00                 | 59.08       | 15.24 (-5.62, 36.10)  | 0.15                  |
| No Benign SNV       | 53.86     | 59.16       | -5.26 (-13.18, 2.66) | 0.19                  | 56.38           | 59.14       | -2.68 (-10.11, 4.74) | 0.48                  | 53.86              | 59.16       | -5.26 (-13.18, 2.66) | 0.19                  | 62.67                 | 59.09       | 3.28 (-8.80, 15.37)   | 0.59                  |
| No Benign SNV & CNV | 56.64     | 59.15       | -2.53 (-8.88, 3.81)  | 0.43                  | 57.92           | 59.13       | -1.18 (-7.02, 4.67)  | 0.69                  | 56.58              | 59.15       | -2.56 (-8.64, 3.51)  | 0.41                  | 62.67                 | 59.09       | 3.28 (-8.80, 15.37)   | 0.59                  |
| Columbia University |           |             |                      |                       |                 |             |                      |                       |                    |             |                      |                       |                       |             |                       |                       |
| SNV                 | 57.92     | 59.39       | -1.47 (-6.24, 3.29)  | 0.54                  | 57.50           | 59.40       | -1.91 (-6.50, 2.67)  | 0.41                  | 57.50              | 59.40       | -1.91 (-6.50, 2.67)  | 0.41                  | NA                    | NA          | NA                    | NA                    |

|                      |       |       |                        |      |       |       |                       |      |       |       |                       |      |       |       |                        |       |
|----------------------|-------|-------|------------------------|------|-------|-------|-----------------------|------|-------|-------|-----------------------|------|-------|-------|------------------------|-------|
| CNV                  | NA    | NA    | NA                     | NA   | NA    | NA    | NA                    | NA   | NA    | NA    | NA                    | NA   | 46.50 | 59.44 | -12.94 (-22.31, -3.56) | 0.007 |
| SNV & CNV            | 57.92 | 59.39 | -1.47 (-6.24, 3.29)    | 0.54 | 57.50 | 59.40 | -1.91 (-6.50, 2.67)   | 0.41 | 57.50 | 59.40 | -1.91 (-6.50, 2.67)   | 0.41 | 46.50 | 59.44 | -12.94 (-22.31, -3.56) | 0.007 |
| Patho SNV            | 60.40 | 59.33 | 1.04 (-9.29, 11.36)    | 0.84 | 60.40 | 59.33 | 1.04 (-9.29, 11.36)   | 0.84 | 60.40 | 59.33 | 1.04 (-9.29, 11.36)   | 0.84 | NA    | NA    | NA                     | NA    |
| Patho SNV & CNV      | 59.35 | 59.34 | 0.004 (-5.64, 5.64)    | 0.99 | 59.35 | 59.34 | 0.004 (-5.64, 5.64)   | 0.99 | 59.35 | 59.34 | 0.004 (-5.64, 5.64)   | 0.99 | NA    | NA    | NA                     | NA    |
| No Benign SNV        | 60.40 | 59.33 | 1.04 (-9.29, 11.36)    | 0.84 | 60.40 | 59.33 | 1.04 (-9.29, 11.36)   | 0.84 | 60.40 | 59.33 | 1.04 (-9.29, 11.36)   | 0.84 | 46.50 | 59.44 | -12.94 (-22.31, -3.56) | 0.007 |
| No Benign SNV & CNV  | 59.35 | 59.34 | 0.004 (-5.64, 5.64)    | 0.99 | 59.35 | 59.34 | 0.004 (-5.64, 5.64)   | 0.99 | 59.35 | 59.34 | 0.004 (-5.64, 5.64)   | 0.99 | 46.50 | 59.44 | -12.94 (-22.31, -3.56) | 0.007 |
| Sheba Medical Center |       |       |                        |      |       |       |                       |      |       |       |                       |      |       |       |                        |       |
| SNV                  | 49.00 | 61.56 | -11.89 (-36.12, 12.35) | .34  | 60.00 | 61.54 | -1.83 (-19.00, 15.33) | .83  | 60.00 | 61.54 | -1.83 (-19.00, 15.33) | .83  | NA    | NA    | NA                     | NA    |
| CNV                  | NA    | NA    | NA                     | NA   | NA    | NA    | NA                    | NA   | NA    | NA    | NA                    | NA   | 69.00 | 61.52 | 8.18 (-16.07, 32.43)   | .51   |
| SNV & CNV            | 49.00 | 61.56 | -11.89 (-36.12, 12.35) | .34  | 60.00 | 61.54 | -1.83 (-19.00, 15.33) | .83  | 60.00 | 61.54 | -1.83 (-19.00, 15.33) | .83  | 69.00 | 61.52 | 8.18 (-16.07, 32.43)   | .51   |
| Patho SNV            | NA    | NA    | NA                     | NA   | NA    | NA    | NA                    | NA   | NA    | NA    | NA                    | NA   | NA    | NA    | NA                     | NA    |

|                                     |           |       |                            |     |           |       |                                |     |           |       |                            |     |           |       |                              |     |
|-------------------------------------|-----------|-------|----------------------------|-----|-----------|-------|--------------------------------|-----|-----------|-------|----------------------------|-----|-----------|-------|------------------------------|-----|
| Patho<br>SNV<br>&<br>CNV            | NA        | NA    | NA                         | NA  | 71.0<br>0 | 61.51 | 8.25<br>(-16.0<br>3,<br>32.53) | .50 | 71.0<br>0 | 61.51 | 8.25<br>(-16.03,<br>32.53) | .50 | NA        | NA    | NA                           | NA  |
| No<br>Benig<br>n<br>SNV             | NA        | NA    | NA                         | NA  | NA        | NA    | NA                             | NA  | NA        | NA    | NA                         | NA  | 69.0<br>0 | 61.52 | 8.18<br>(-16.07,<br>32.43)   | .51 |
| No<br>Benig<br>n<br>SNV<br>&<br>CNV | NA        | NA    | NA                         | NA  | 71.0<br>0 | 61.51 | 8.25<br>(-16.0<br>3,<br>32.53) | .50 | 71.0<br>0 | 61.51 | 8.25<br>(-16.03,<br>32.53) | .50 | 69.0<br>0 | 61.52 | 8.18<br>(-16.07,<br>32.43)   | .51 |
| Meta-Analysis                       |           |       |                            |     |           |       |                                |     |           |       |                            |     |           |       |                              |     |
| SNV                                 | 57.8<br>6 | 59.82 | -1.40 (-<br>5.10,<br>2.30) | .46 | 58.2<br>6 | 59.82 | -1.04<br>(-4.51,<br>2.42)      | .56 | 57.8<br>8 | 59.83 | -<br>1.50(-5.0<br>2, 2.03) | .40 | 74.0<br>0 | 59.77 | 15.24<br>(-5.59,<br>36.06)   | .15 |
| CNV                                 | NA        | NA    | NA                         | NA  | NA        | NA    | NA                             | NA  | NA        | NA    | NA                         | NA  | 51.3<br>3 | 59.82 | -8.26<br>(-15.78, -0.<br>75) | .03 |
| SNV<br>&<br>CNV                     | 57.8<br>6 | 59.82 | -1.40<br>(-5.10,<br>2.30)  | .46 | 58.2<br>6 | 59.82 | -1.04<br>(-4.51,<br>2.44)      | .56 | 57.8<br>8 | 59.83 | -1.50<br>(-5.02,<br>2.03)  | .40 | 53.6<br>0 | 59.82 | -5.56<br>(-12.63,<br>1.51)   | .12 |
| Patho<br>SNV                        | 56.5<br>8 | 59.80 | -2.93(-9.2<br>0, 3.35)     | .36 | 57.9<br>2 | 59.80 | -1.42<br>(-7.43,<br>4.60)      | .64 | 56.5<br>8 | 59.80 | -2.93<br>(-9.20,<br>3.35)  | .36 | 74.0<br>0 | 59.77 | 15.24<br>(-5.59,<br>36.06)   | .15 |
| Patho<br>SNV<br>&<br>CNV            | 56.5<br>8 | 59.80 | -2.93(-9.2<br>0, 3.35)     | .36 | 57.9<br>2 | 59.80 | -1.42<br>(-7.43,<br>4.60)      | .64 | 56.5<br>8 | 59.80 | -2.93<br>(-9.20,<br>3.35)  | .36 | 53.6<br>0 | 59.82 | -5.56<br>(-12.63,<br>1.51)   | .12 |
| No<br>Benig<br>n<br>SNV             | 58.2<br>8 | 59.81 | -1.12<br>(-5.32,<br>3.09)  | .60 | 59.1<br>3 | 59.79 | -0.33<br>(-4.32,<br>3.67)      | .87 | 58.6<br>3 | 59.80 | -0.92<br>(-4.99,<br>3.15)  | .66 | 74.0<br>0 | 59.77 | 15.24<br>(-5.59,<br>36.06)   | .15 |
| No<br>Benig<br>n<br>SNV             | 58.2<br>9 | 59.81 | -1.12<br>(-5.32,<br>3.09)  | .60 | 59.1<br>3 | 59.79 | -0.33<br>(-4.32,<br>3.67)      | .87 | 58.6<br>3 | 59.80 | -0.92<br>(-4.99,<br>3.15)  | .66 | 53.6<br>0 | 59.82 | -5.56<br>(-12.63,<br>1.51)   | .12 |

|          |  |  |  |  |  |  |  |  |  |  |  |  |  |  |  |  |  |
|----------|--|--|--|--|--|--|--|--|--|--|--|--|--|--|--|--|--|
| &<br>CNV |  |  |  |  |  |  |  |  |  |  |  |  |  |  |  |  |  |
|----------|--|--|--|--|--|--|--|--|--|--|--|--|--|--|--|--|--|

Abbreviations: SNV—Single Nucleotide Variant; CNV—Copy Number Variation; PD—Parkinson's Disease; Patho—pathogenic and likely pathogenic variants; No Benign—analysis excluding benign and likely benign variants.

<sup>a</sup> After Bonferroni correction, alpha=.0018 (28 tests)

**Table S6. Rare *PRKN* SNVs and CNVs association analysis in PD from previous studies<sup>a</sup>.**

| Study                             | Number of carriers in patients (%) | Number of carriers in controls (%) | Analysis performed                                                                       | Association with PD |
|-----------------------------------|------------------------------------|------------------------------------|------------------------------------------------------------------------------------------|---------------------|
| Heterozygous PARK2 SNVs           |                                    |                                    |                                                                                          |                     |
| Bandrés-Ciga <i>et al.</i> , 2016 | 1/206 (0.5)                        | 0/172 (0)                          | Full sequencing in cohort for SNV                                                        | Not significant     |
| Benitez <i>et al.</i> , 2016      | 13/478 (2.7)                       | 9/337 (2.7)                        | Full sequencing in cohort for SNV                                                        | Not significant     |
| Bras <i>et al.</i> , 2008         | 1/61 (2)                           | 0/126 (0)                          | Full sequencing in family for SNV                                                        | Not significant     |
| Brooks <i>et al.</i> , 2009       | 14/249 (5.6)                       | 7/276 (2.5)                        | Full sequencing in cohort for SNV                                                        | Not significant     |
| Camargos <i>et al.</i> , 2009     | 2/42 (5)                           | 0/126 (0)                          | Full sequencing in early onset patients for SNV, screening for specific SNVs in controls | Not significant     |
| Clark <i>et al.</i> , 2006        | 5/99 (5)                           | 0/105 (0)                          | Full sequencing in cohort for SNV                                                        | 0.03                |
| Fiala <i>et al.</i> , 2014        | 2/67 (3)                           | 0/75 (0)                           | Full sequencing in early onset patients and controls for SNV                             | Not significant     |
| Kay <i>et al.</i> , 2007          | 19/301 (6.3)                       | 19/300 (6.3)                       | Full sequencing in cohort for SNV                                                        | Not significant     |
| Klein <i>et al.</i> , 2005        | 1/64 (2)                           | 0/100 (0)                          | Full sequencing in patients for SNV, screening for specific SNVs in controls             | Not significant     |
| Lesage <i>et al.</i> , 2008       | 10/159 (6.3)                       | 0/170 (0)                          | Full sequencing in cohort for SNV                                                        | 0.0006              |
| Lincoln <i>et al.</i> , 2003      | 7/312 (2.2)                        | 5/192 (2.6)                        | Full sequencing in cohort for SNV                                                        | Not significant     |
| Macedo <i>et al.</i> , 2009       | 3/181 (1.7)                        | 0/375 (0)                          | Full sequencing in patients for SNV, screening for specific SNVs in controls             | 0.03                |

|                                   |               |                 |                                                                              |                 |
|-----------------------------------|---------------|-----------------|------------------------------------------------------------------------------|-----------------|
| Moura <i>et al.</i> , 2013        | 2/132 (1.5)   | 0/200 (0)       | Full sequencing in patients for SNV, screening for specific SNVs in controls | Not significant |
| Sironi <i>et al.</i> , 2008       | 9/133 (6.8)   | 2/50 (4)        | Full sequencing in patients for SNV, screening for specific SNVs in controls | Not significant |
| Spataro <i>et al.</i> , 2017      | 7/243 (2.9)   | 1/145 (0.7)     | Full sequencing in cohort for SNV                                            | Not significant |
| Wang <i>et al.</i> , 2008         | 12/240 (5.0)  | 0/104 (0)       | Full sequencing in patients for SNV, screening for specific SNVs in controls | 0.02            |
| Heterozygous PARK2 CNVs           |               |                 |                                                                              |                 |
| Bandrés-Ciga <i>et al.</i> , 2016 | 1/206 (0.5)   | 0/172 (0)       | Full sequencing in cohort for CNV                                            | Not significant |
| Bras <i>et al.</i> , 2008         | 3/61 (5)      | 0/126 (0)       | Full sequencing in family for CNV                                            | 0.03            |
| Clark <i>et al.</i> , 2006        | 3/99 (3)      | 0/105 (0)       | Full sequencing in cohort for CNV                                            | Not significant |
| Fiala <i>et al.</i> , 2014        | 3/67 (4)      | 0/75 (0)        | Full sequencing in early onset patients and controls for CNV                 | Not significant |
| Camacho <i>et al.</i> , 2012      | 11/40 (28)    | 1/120 (0.8)     | Full sequencing in early onset patients and controls for CNV                 | <0.00001        |
| Huttenlocher <i>et al.</i> , 2015 | 22/1393 (1.6) | 373/40101 (0.9) | Full sequencing in cohort for CNV                                            | 0.02            |
| Kay <i>et al.</i> , 2010          | 18/2073 (0.9) | 16/1670 (1.0)   | Full sequencing in cohort for CNV                                            | Not significant |
| Lesage <i>et al.</i> , 2008       | 5/159 (3.1)   | 0/170 (0)       | Full sequencing in cohort for CNV                                            | 0.03            |
| Lincoln <i>et al.</i> , 2003      | 2/312 (0.6)   | 1/192 (0.5)     | Full sequencing in cohort for CNV                                            | Not significant |
| Macedo <i>et al.</i> , 2009       | 3/181 (1.7)   | 0/375 (0)       | Full sequencing in patients for CNV, screening for specific CNVs in controls | 0.03            |
| Pankratz <i>et al.</i> , 2011     | 10/396 (2.5)  | 8/856 (0.9)     | Full sequencing in cohort for CNV                                            | 0.04            |



|                                  |             |             |                                                                              |                 |
|----------------------------------|-------------|-------------|------------------------------------------------------------------------------|-----------------|
| Simon-Sanchez <i>et al.</i> 2008 | 3/272 (1.1) | 4/274 (1.5) | Full sequencing in cohort for CNV                                            | Not significant |
| Wang <i>et al.</i> 2008          | 4/240 (1.7) | 0/104 (0)   | Full sequencing in patients for CNV, screening for specific CNVs in controls | Not significant |

<sup>a</sup> This table shows previous heterozygous *PRKN* variants analysis on risk for PD. We wish to highlight the different type of analysis and variant inclusion criteria across studies. The association of heterozygous *PRKN* mutations in each study was calculated using Fisher's exact test.

Abbreviations: SNV—Single Nucleotide Variant; CNV—Copy Number Variation; PD—Parkinson's Disease.

## Reference

- Bandrés-Ciga S, Price TR, Barrero FJ, Escamilla-Sevilla F, Pelegrina J, Arepalli S, *et al.* Genome-wide assessment of Parkinson's disease in a Southern Spanish population. *Neurobiol Aging* 2016; 45: 213. e3-. e9.
- Benitez BA, Davis AA, Jin SC, Ibanez L, Ortega-Cubero S, Pastor P, *et al.* Resequencing analysis of five Mendelian genes and the top genes from genome-wide association studies in Parkinson's Disease. *Mol Neurodegener* 2016; 11(1): 29.
- Bras J, Guerreiro R, Ribeiro M, Morgadinho A, Januario C, Dias M, *et al.* Analysis of Parkinson disease patients from Portugal for mutations in SNCA, PRKN, PINK1 and LRRK2. *BMC Neurol* 2008; 8(1): 1.
- Brooks J, Ding J, Simon-Sanchez J, Paisan-Ruiz C, Singleton A, Scholz S. Parkin and PINK1 mutations in early-onset Parkinson's disease: comprehensive screening in publicly available cases and control. *J Med Genet* 2009; 46(6): 375-81.
- Camacho JLG, Jaramillo NM, Gómez PY, Violante MR, Woehrlen CB, Vilatela MEA, *et al.* High frequency of Parkin exon rearrangements in Mexican-mestizo patients with early-onset Parkinson's disease. *Movement disorders* 2012; 27(8): 1047-51.
- Camargos ST, Dornas LO, Momeni P, Lees A, Hardy J, Singleton A, *et al.* Familial Parkinsonism and early onset Parkinson's disease in a Brazilian movement disorders clinic: Phenotypic characterization and frequency of SNCA, PRKN, PINK1, and LRRK2 mutations. *Movement Disorders* 2009; 24(5): 662-6.
- Clark LN, Afridi S, Karlins E, Wang Y, Mejia-Santana H, Harris J, *et al.* Case-control study of the parkin gene in early-onset Parkinson disease. *Arch Neurol* 2006; 63(4): 548-52.
- Fiala O, Zahorakova D, Pospisilova L, Kucerova J, Matejckova M, Martasek P, *et al.* Parkin (PARK 2) mutations are rare in Czech patients with early-onset Parkinson's disease. *PLoS One* 2014; 9(9).
- Huttenlocher J, Stefansson H, Steinberg S, Helgadottir HT, Sveinbjörnsdóttir S, Riess O, *et al.* Heterozygote carriers for CNVs in PARK2 are at increased risk of Parkinson's disease. *Hum Mol Genet* 2015; 24(19): 5637-43.
- Kay D, Stevens C, Hamza T, Montimurro J, Zabetian C, Factor S, *et al.* A comprehensive analysis of deletions, multiplications, and copy number variations in PARK2. *Neurology* 2010; 75(13): 1189-94.
- Kay DM, Moran D, Moses L, Poorkaj P, Zabetian CP, Nutt J, *et al.* Heterozygous parkin point mutations are as common in control subjects as in Parkinson's patients. *Ann Neurol* 2007; 61(1): 47-54.
- Klein C, Djarmati A, Hedrich K, Schäfer N, Scaglione C, Marchese R, *et al.* PINK1, Parkin, and DJ-1 mutations in Italian patients with early-onset parkinsonism. *European journal of human genetics* 2005; 13(9): 1086-93.
- Lesage S, Lohmann E, Tison F, Durif F, Dürr A, Brice A, *et al.* Rare heterozygous parkin variants in French early-onset Parkinson disease patients and controls. *J Med Genet* 2008; 45(1): 43-6.
- Lincoln SJ, Maraganore DM, Lesnick TG, Bounds R, De Andrade M, Bower JH, *et al.* Parkin variants in North American Parkinson's disease: cases and controls. *Movement disorders: official journal of the Movement Disorder Society* 2003; 18(11): 1306-11.
- Macedo MG, Verbaan D, Fang Y, van Rooden SM, Visser M, Anar B, *et al.* Genotypic and phenotypic characteristics of Dutch patients with early onset Parkinson's disease. *Movement disorders: official journal of the Movement Disorder Society* 2009; 24(2): 196-203.

Moura KCV, Campos Junior M, de Rosso ALZ, Nicaretta DH, Pereira JS, Silva DJ, *et al.* Genetic analysis of PARK2 and PINK1 genes in Brazilian patients with early-onset Parkinson's disease. *Dis Markers* 2013; 35(3): 181-5.

Pankratz N, Dumitriu A, Hetrick KN, Sun M, Latourelle JC, Wilk JB, *et al.* Copy number variation in familial Parkinson disease. *PLoS One* 2011; 6(8).

Simon-Sanchez J, Scholz S, del Mar Matarin M, Fung HC, Hernandez D, Gibbs JR, *et al.* Genomewide SNP assay reveals mutations underlying Parkinson disease. *Hum Mutat* 2008; 29(2): 315-22.

Sironi F, Primignani P, Zini M, Tunesi S, Ruffmann C, Ricca S, *et al.* Parkin analysis in early onset Parkinson's disease. *Parkinsonism Relat Disord* 2008; 14(4): 326-33.

Spataro N, Roca-Umbert A, Cervera-Carles L, Vallès M, Anglada R, Pagonabarraga J, *et al.* Detection of genomic rearrangements from targeted resequencing data in Parkinson's disease patients. *Movement Disorders* 2017; 32(1): 165-9.

Wang Y, Clark LN, Louis ED, Mejia-Santana H, Harris J, Cote LJ, *et al.* Risk of Parkinson disease in carriers of parkin mutations: estimation using the kin-cohort method. *Arch Neurol* 2008; 65(4): 467-74.
